# Supplementary material
Source: publisher figshare collection journal article supplement (https://frontiersin.figshare.com/ndownloader/files/26537492)
Supplement: Supplementary file [file 26537492]

**Supplementary Figure 1:**

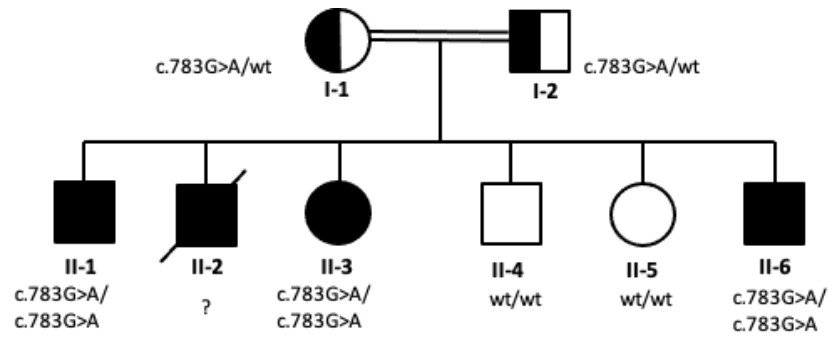

Family pedigree with the zygosity of the pathogenic variant per member. Solid symbols represent the affected probands (diagonal line shows death). Half solid symbols represent unaffected relatives, which are carriers for the variant. Open symbols represent unaffected relatives.
